# Supplementary material
Source: publisher site journal article supplement (https://www.dovepress.com/article/288012)
Supplement: Supplementary file 1 [file get_supplementary_file.php]

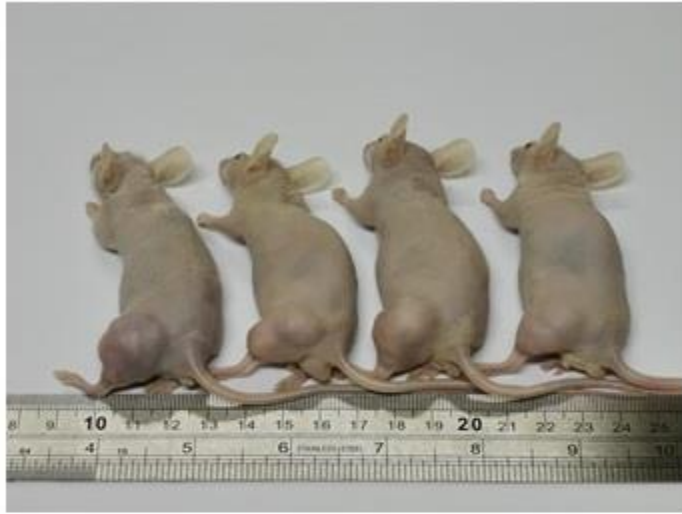

Control

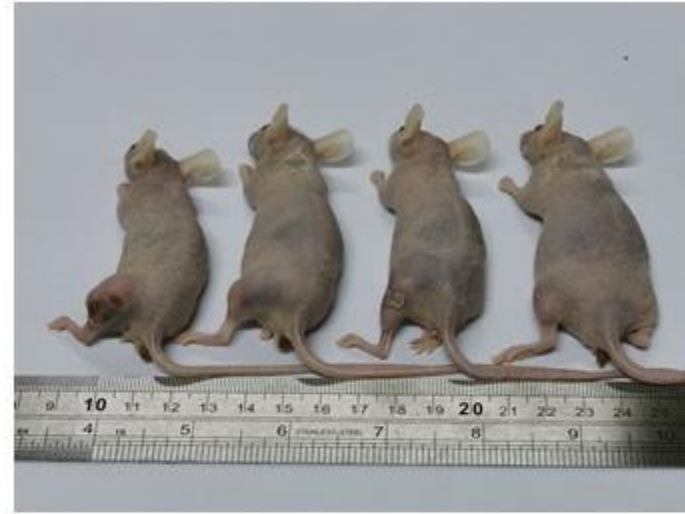

I-125

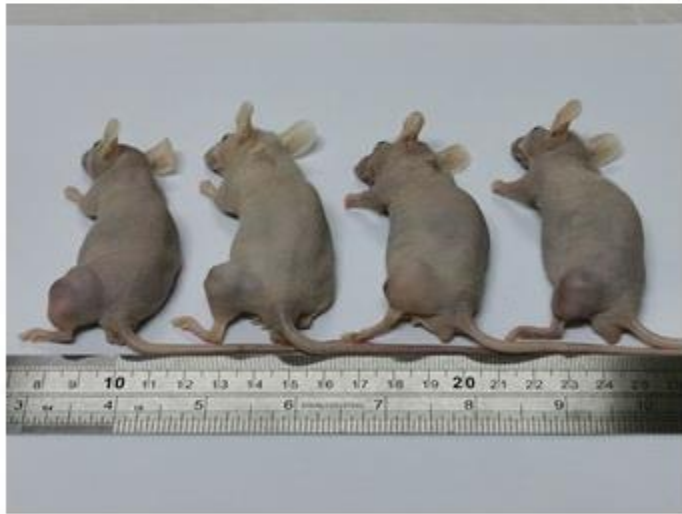

LBP

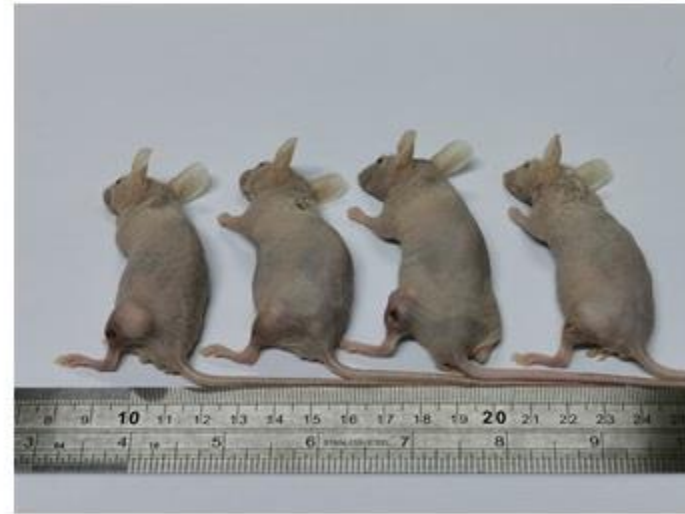

LBP+I-125

Figure S1

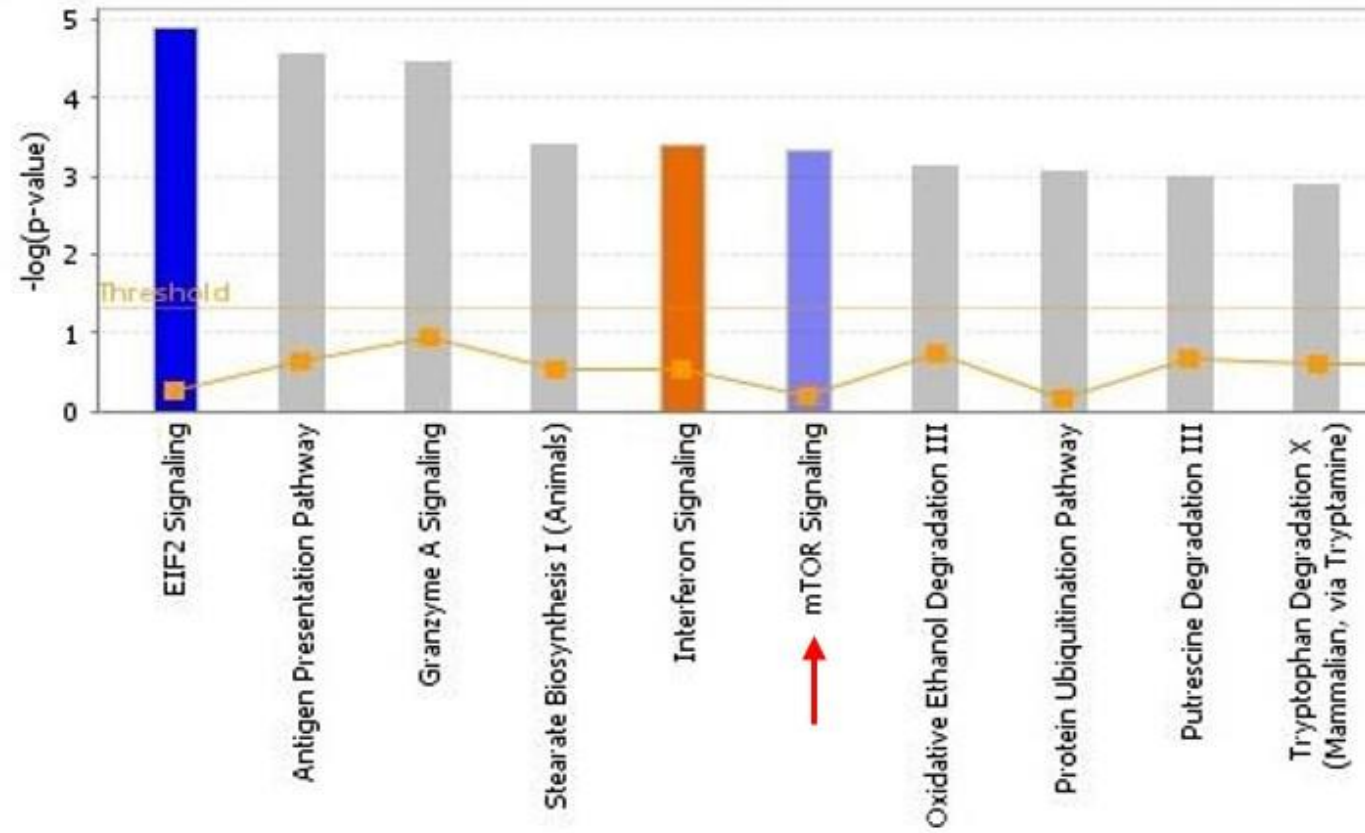

Figure S2

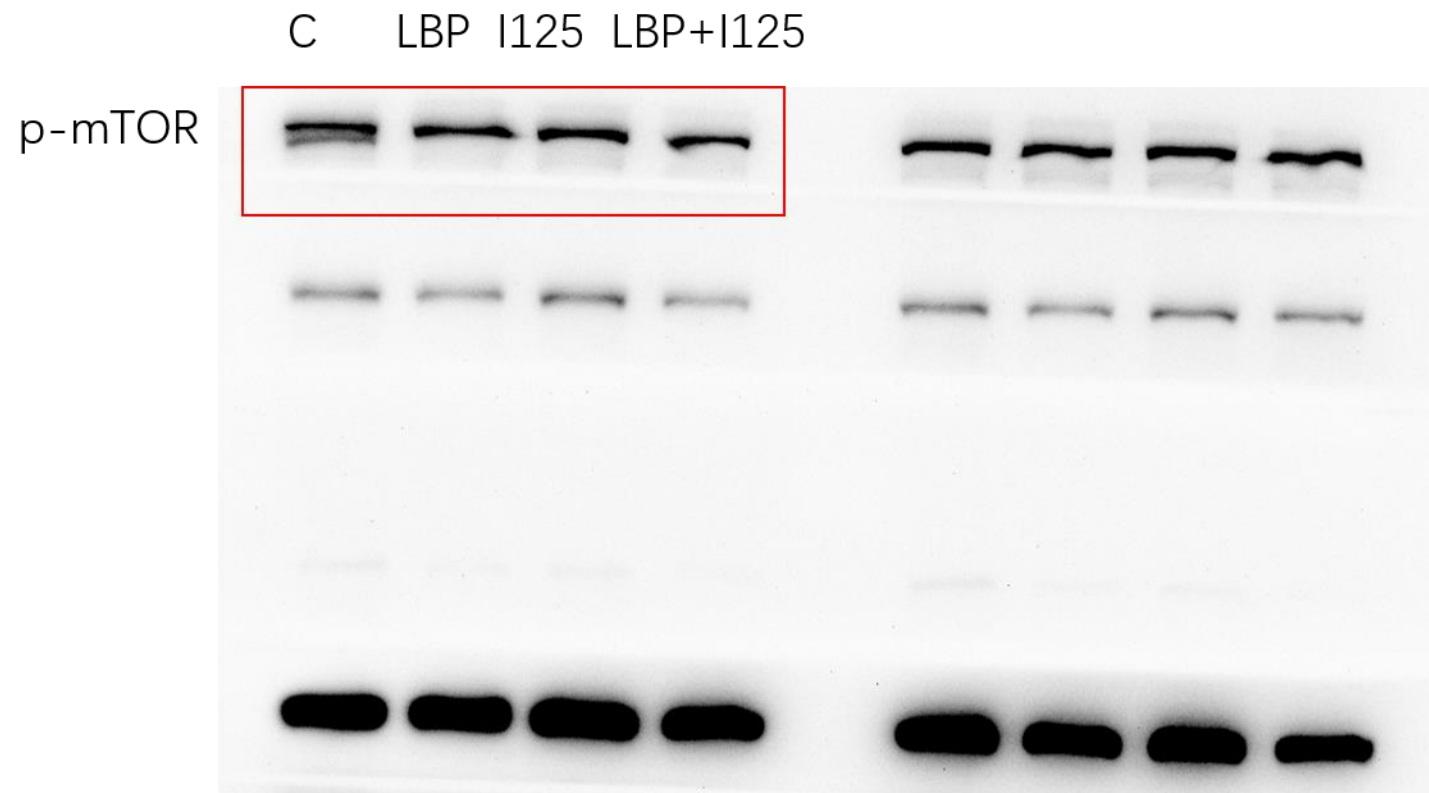

Figure S3

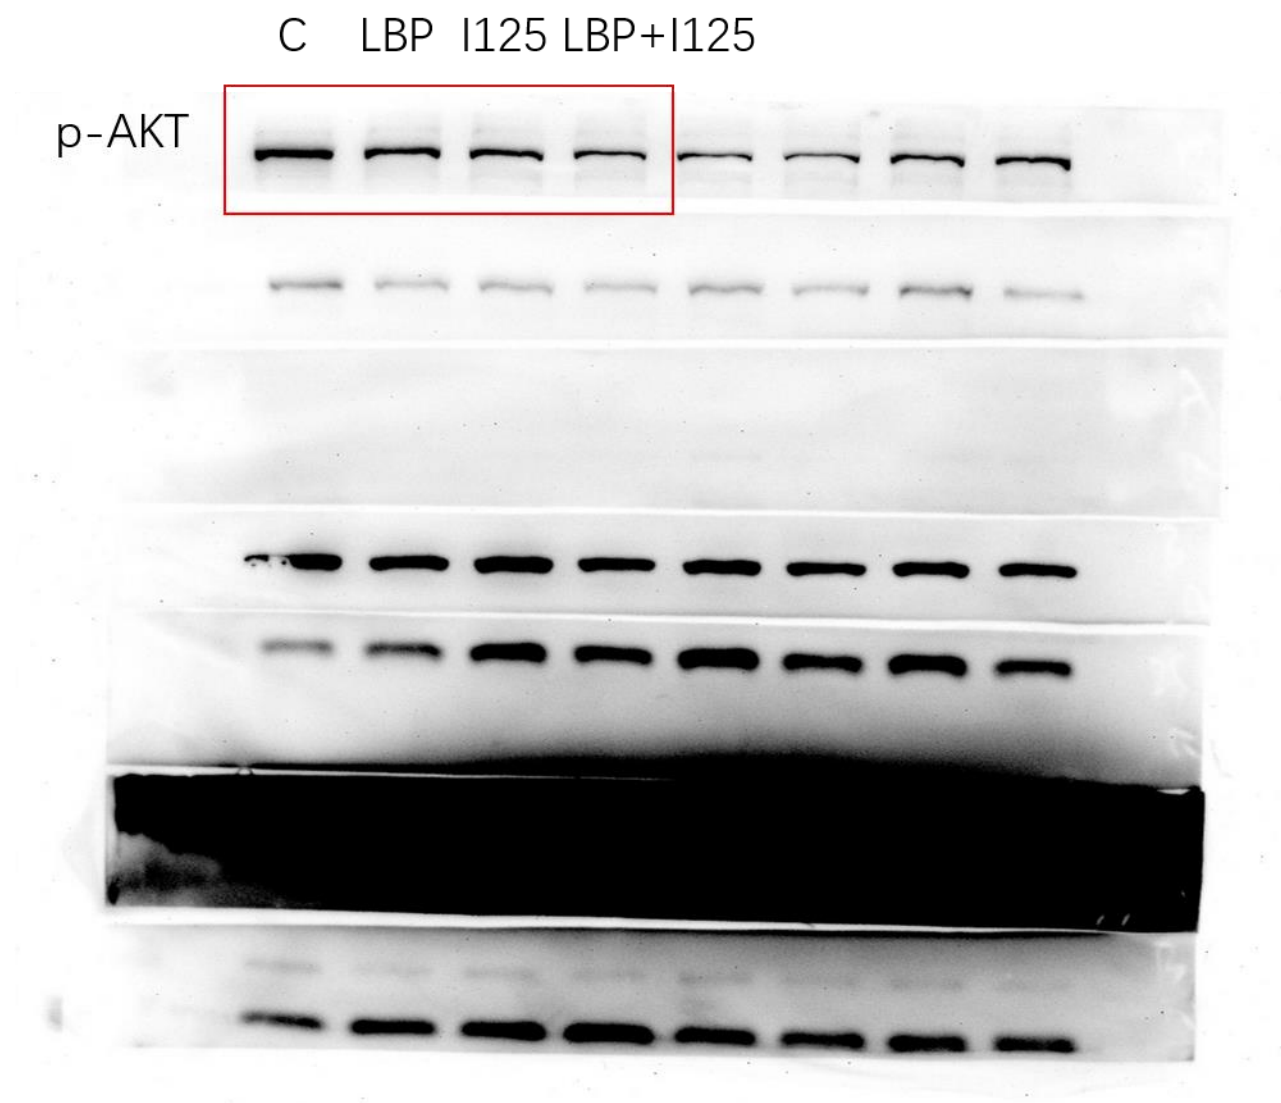

Figure S4

## Supplementary figure legends

Figure S1. The tumor burden images of Figure 3.

Figure S2. The iTraq result after treatment of  $^{125}\text{I}$ .

Figure S3. The original uncut western blot bands of p-mTOR in Figure 6A.

Figure S4. The original uncut western blot bands of p-AKT in Figure 6A.
